# Supplementary material
Source: PubMed Central journal article supplement (PMC5165663)
Supplement: Supp_Table1.pdf [file Supp_Table1.pdf]

## Supplementary Data

SUPPLEMENTARY TABLE S1. DEMOGRAPHIC CHARACTERISTICS OF RESPONDENTS INCLUDED AND EXCLUDED FROM ANALYSIS

| <i>Demographic characteristics</i>                     | <i>Included respondents (%)</i> | <i>Excluded respondents n (%)</i> | $\chi^2$ [Cramer's V] | P <sup>a</sup> |
|--------------------------------------------------------|---------------------------------|-----------------------------------|-----------------------|----------------|
| Method of recruitment                                  | 1705 (100)                      | 663 (100)                         | 14.423 [0.78]         | 0.001*         |
| SGM-specific medical organization                      | 154 (9.03)                      | 55 (8.30)                         |                       |                |
| Non-SGM-specific medical organization                  | 1446 (84.81)                    | 537 (81.00)                       |                       |                |
| Other (SGM specificity unknown)                        | 105 (6.16)                      | 71 (10.71)                        |                       |                |
| Reported natal sex <sup>b</sup>                        | 1877 (100)                      | 568 (100)                         | 0.186 [0.119]         | 0.911          |
| Female                                                 | 1037 (55.25)                    | 312 (54.93)                       |                       |                |
| Male                                                   | 838 (44.65)                     | 255 (44.89)                       |                       |                |
| Intersex                                               | 2 (0.11)                        | 1 (0.18)                          |                       |                |
| Gender identity                                        | 1886 (100)                      | 565 (100)                         | 8.282 [0.058]         | 0.141          |
| Woman                                                  | 1020 (54.08)                    | 314 (55.58)                       |                       |                |
| Man                                                    | 845 (44.80)                     | 246 (43.54)                       |                       |                |
| Transwoman                                             | 1 (0.05)                        | 2 (0.35)                          |                       |                |
| Transman                                               | 3 (0.16)                        | 2 (0.35)                          |                       |                |
| Genderqueer                                            | 13 (0.69)                       | 0 (0.00)                          |                       |                |
| Other                                                  | 4 (0.90)                        | 1 (0.18)                          |                       |                |
| Sexual orientation identity                            | 1886 (100)                      | 560 (100)                         | 5.570 [0.048]         | 0.350          |
| Lesbian                                                | 68 (3.60)                       | 15 (2.68)                         |                       |                |
| Bisexual                                               | 66 (3.50)                       | 24 (4.29)                         |                       |                |
| Gay                                                    | 173 (9.17)                      | 40 (7.14)                         |                       |                |
| Queer                                                  | 29 (1.54)                       | 5 (0.89)                          |                       |                |
| Heterosexual                                           | 1531 (81.18)                    | 470 (83.93)                       |                       |                |
| Other                                                  | 19 (1.01)                       | 6 (1.07)                          |                       |                |
| Race/ethnicity                                         | 1878 (100)                      | 566 (100)                         | 4.597 [0.043]         | 0.331          |
| Hispanic, Latino or of Spanish origin                  | 83 (4.42)                       | 30 (5.30)                         |                       |                |
| Asian                                                  | 314 (16.72)                     | 91 (16.08)                        |                       |                |
| Black or African American                              | 118 (6.28)                      | 45 (7.95)                         |                       |                |
| White                                                  | 1258 (66.99)                    | 377 (66.61)                       |                       |                |
| Other                                                  | 105 (5.59)                      | 81 (14.31)                        |                       |                |
| Type of medical school                                 | 1871 (100)                      | 568 (100)                         | 3.724 [0.039]         | 0.054          |
| Allopathic                                             | 1353 (72.31)                    | 387 (68.13)                       |                       |                |
| Osteopathic                                            | 518 (27.69)                     | 181 (31.87)                       |                       |                |
| Region of medical school                               | 1864 (100)                      | 559 (100)                         | 0.621 [0.016]         | 0.961          |
| Northeast                                              | 483 (25.91)                     | 137 (24.51)                       |                       |                |
| Midwest                                                | 588 (31.55)                     | 178 (31.84)                       |                       |                |
| South                                                  | 470 (25.21)                     | 148 (26.48)                       |                       |                |
| West                                                   | 221 (11.86)                     | 66 (11.81)                        |                       |                |
| Outside of the United States                           | 102 (5.47)                      | 30 (5.37)                         |                       |                |
| Prestige of medical specialty of practice <sup>c</sup> | 988 (100)                       | 298 (100)                         | 3.002 [0.048]         | 0.083          |
| Low prestige                                           | 755 (76.42)                     | 213 (71.48)                       |                       |                |
| High prestige                                          | 233 (23.58)                     | 85 (28.52)                        |                       |                |

  

| <i>Demographic characteristics</i>             | <i>Included respondents, mean [SD]</i> | <i>Excluded respondents, mean [SD]</i> | P <sup>a</sup> |
|------------------------------------------------|----------------------------------------|----------------------------------------|----------------|
| Age (years) <sup>d</sup>                       | 31.3501 [10.63094]                     | 32.9395 [12.30408]                     | 0.006*         |
| Year of medical school graduation <sup>d</sup> | 2011.54 [10.595]                       | 2009.92 [12.205]                       | 0.004*         |

<sup>a</sup>Two-sided *P*-value less than 0.05 considered statistically significant, indicated by \*.

<sup>b</sup>Individuals born with an intersex condition, alternately referred to as a difference of sex development, have a congenital condition in which the development of chromosomal, gonadal, or anatomical sex is atypical relative to normatively developed males or females. "Intersex" was included as a response option for reported natal sex.

<sup>c</sup>Nongraduating medical students (i.e., medical students who have not yet been accepted to train in a given medical specialty) were excluded from this analysis.

<sup>d</sup>Relations between SGM identity and age, and between SGM identity and year graduated from medical school, were evaluated by using independent-samples *t*-tests. The Levine test of equality of variance indicated a threat to the assumption of homogeneity of variance for all *t*-tests, so *t*-tests were run without the assumption of equal variances.

SGM, sexual and gender minority.
